# Supplementary material for: 4D-CTA Collateral Status Predicts Functional Outcome and Parenchymal Hematoma in Anterior Circulation Large Vessel Occlusion Stroke
Source: Research Square preprint supplement (doi:10.21203/rs.3.rs-8778505/v1), 2026-02-19
Supplement: Supplementary file 1 [file ecbe66b27fa1d6619552442e.docx]

**Supplementary Appendix**

**1.Supplementary Statistical Methods**

Additional methodological details are provided to support model validity and reproducibility.

**2.Supplementary Tables**

• Table S1. Extended baseline laboratory and metabolic variables by collateral group (0-1, 2, 3-4)

• Table S2. Full multivariable model coefficients for primary outcome (90-day mRS shift): overall cohort (N=196)

• Table S3. Full multivariable model coefficients for primary outcome (90-day mRS shift): EVT subgroup (N=116)

• Table S4. Sensitivity analysis for parenchymal hematoma (PH): three-category collateral (0-1, 2, 3-4), Firth logistic regression: overall cohort (N=196)

• Table S5. Sensitivity analysis for parenchymal hematoma (PH): three-category collateral (0-1, 2, 3-4), Firth logistic regression: EVT subgroup (N=116)

• Table S6. Sensitivity analysis using collateral score as a continuous variable (per 1-point increase): 90-day mRS shift and parenchymal hematoma (PH) in overall and EVT cohorts

• Table S7. Covariate balance before and after inverse probability of treatment weighting (IPTW)

• Table S8. Association of endovascular thrombectomy (EVT) with outcomes: unadjusted, IPTW-weighted, and doubly robust analyses

• Table S9. Global test for collateral-by-endovascular thrombectomy (EVT) interaction on 90-day mRS shift (proportional odds model)
• Table S10. Inter-rater reliability for 4D-CTA collateral grading (0-4)

**3.Supplementary Figure**

• Figure S1. Receiver operating characteristic (ROC) curves for predicting favorable 90-day functional outcome (mRS 0–2) using the clinical model alone and the clinical-plus-collateral model

**Supplementary Statistical Methods**

Additional methodological details are provided to support model validity and reproducibility.

**Proportional odds assumption**
*For the primary analysis of the 90-day mRS shift, proportional odds ordinal logistic regression was applied. The proportional odds assumption was assessed using the Brant test. No significant violation of the proportional odds assumption was detected for the primary model; therefore, the ordinal logistic model was retained. As a sensitivity analysis, alternative modeling strategies were explored, yielding consistent effect directions.*

**Handling of missing data**
*All analyses were conducted using a complete-case approach. The proportion of missing data for variables included in the multivariable models was low, and no multiple imputation was performed.*

**Trend analysis (P for trend)**
*To assess dose–response relationships, a test for trend was performed by modeling collateral status as an ordinal variable within the same multivariable-adjusted ordinal logistic regression model. Collateral categories were coded as follows: poor (0–1) = 1, intermediate (2) = 2, and good (3–4) = 3. The resulting Pfor trend reflects the linear trend across increasing collateral grades after adjustment for prespecified covariates.*

**Supplementary Tables**

***Table S1. Extended baseline laboratory and metabolic variables by collateral group (0–1, 2, 3–4)***

| ***Variable*** | **collateral 0–1**  **(n=39)** | **collateral 2**  **(n=77)** | **collateral 3–4**  **(n=80)** | ***P value*** |
| --- | --- | --- | --- | --- |
| *Coronary heart disease* | *3 (7.7%)* | *14 (18.2%)* | *11(13.8%)* | *0.308* |
| *Smoking* | *9 (23.1%)* | *30 (39.0%)* | *24 (30.0%)* | *0.194* |
| *Alcohol use* | *11 (28.2%)* | *26 (33.8%)* | *240 (30.0%)* | *0.797* |
| *Heart valve disease* | *2 (5.1%)* | *8 (10.4%)* | *10 (12.5%)* | *0.458* |
| *BMI, kg/m²* | *24.2 [22.2–27.5]* | *23.3 [20.3–25.7]* | *23.9 [22.2–26.5]* | *0.229* |
| *SBP, mmHg* | *142 [128–158]* | *148 [133–161]* | *145 [126–151]* | *0.426* |
| *DBP, mmHg* | *80.0 [72.0–83.0]* | *81.0 [70.0–88.0]* | *72.0 [68.0–87.0]* | *0.438* |
| *HbA1c, %* | *6.00 [5.60–6.60]* | *6.10 [5.50–6.60]* | *6.00 [5.62–6.88]* | *0.954* |
| *TC, mmol/L* | *4.15 [3.57–4.70]* | *4.11 [3.49–4.79]* | *4.39 [3.56–5.03]* | *0.217* |
| *TG, mmol/L* | *1.08 [0.81–1.38]* | *1.06 [0.76–1.30]* | *1.13 [0.91–1.77]* | *0.177* |
| *LDL-C, mmol/L* | *2.63 [2.09–3.01]* | *2.45 [1.85–2.96]* | *2.63 [1.89–3.29]* | *0.313* |
| *Homocysteine, μmol/L* | *12.2 [9.70–14.9]* | *10.6 [9.28–13.7]* | *12.3 [9.55–15.4]* | *0.150* |
| *NT-proBNP, pg/mL* | *1151 [321–1918]* | *832 [374–2245]* | *409 [119–1417]* | *0.037* |
| *cTnT, ng/mL* | *0.01 [0.01–0.02]* | *0.01 [0.01–0.02]* | *0.01 [0.01–0.01]* | *0.070* |
| *Myoglobin, ng/mL* | *40.9 [28.2–61.3]* | *45.4 [27.8–71.4]* | *30.2 [22.6–44.9]* | *0.006* |
| *CK-MB, ng/mL* | *1.65 [1.06–2.90]* | *2.23 [1.51–2.75]* | *1.76 [1.10–2.37]* | *0.046* |

*BMI, Body mass index; SBP, Systolic blood pressure; DBP, Diastolic blood pressure; HbA1c, Glycated hemoglobin A1c; TC, Total cholesterol; TG, Triglycerides; LDL-C, Low-density lipoprotein cholesterol; NT-proBNP,N-terminal pro-B-type natriuretic peptide; cTnT, Cardiac troponin T; CK-MB, Creatine kinase-MB.*

*Data are presented as median [interquartile range] or n/N (%), as appropriate. P values were calculated using the Kruskal–Wallis test for continuous variables and the chi-square test for categorical variables.*

**Table S2. Full multivariable model coefficients for primary outcome (90-day mRS shift): overall cohort (N=196)**

| **Term** | **Adjusted cOR (95% CI)** | **P value** |
| --- | --- | --- |
| Collateral 2 vs 0–1 | 0.72 (0.33–1.53) | 0.395 |
| Collateral 3–4 vs 0–1 | 0.24 (0.09–0.64) | 0.005 |
| Age (per year) | 1.03 (1.01–1.06) | 0.007 |
| Male sex | 0.99 (0.56–1.73) | 0.960 |
| NIHSS (per point) | 1.13 (1.07–1.20) | <0.001 |
| ASPECTS (per point) | 0.77 (0.63–0.95) | 0.013 |
| Onset-to-CT time (per hour) | 0.99 (0.96–1.02) | 0.648 |
| IVT (yes vs no) | 0.87 (0.48–1.59) | 0.657 |
| EVT (yes vs no) | 0.59 (0.31–1.12) | 0.107 |

*NIHSS, National Institutes of Health Stroke Scale; ASPECTS, Alberta Stroke Program Early CT Score; IVT, intravenous thrombolysis; EVT, endovascular thrombectomy.*

*Model adjusted for age, sex, NIHSS, ASPECTS, onset-to-CT time, IVT, EVT, and collateral categories (0–1 reference).*

**Table S3. Full multivariable model coefficients for primary outcome (90-day mRS shift): EVT subgroup (N=116)**

| **Term** | **Adjusted cOR (95% CI)** | **P value** |
| --- | --- | --- |
| Collateral 2 vs 0–1 | 0.82 (0.35–1.94) | 0.652 |
| Collateral 3–4 vs 0–1 | 0.51 (0.14–1.81) | 0.296 |
| Age (per year) | 1.06 (1.03–1.11) | <0.001 |
| Male sex | 1.53 (0.71–3.29) | 0.275 |
| NIHSS (per point) | 1.14 (1.06–1.22) | <0.001 |
| ASPECTS (per point) | 0.75 (0.58–0.97) | 0.030 |
| Onset-to-CT time (per hour) | 1.03 (0.95–1.13) | 0.459 |
| IVT (yes vs no) | 1.16 (0.52–2.56) | 0.716 |
| eTICI_success (≥2b67) | 0.29 (0.11–0.77) | 0.013 |

*NIHSS, National Institutes of Health Stroke Scale; ASPECTS, Alberta Stroke Program Early CT Score; CT,* *computed tomography; IVT, intravenous thrombolysis; eTICI, expanded Thrombolysis in Cerebral Infarction; OR, odds ratio; CI, confidence interval.*

*EVT subgroup model adjusted for age, sex, NIHSS, ASPECTS, onset-to-CT time, IVT, and eTICI_success (eTICI ≥2b67), plus collateral categories (0–1 reference).*

**Table S4. Sensitivity analysis for parenchymal hematoma (PH): three-category collateral (0-1, 2, 3-4), Firth logistic regression: overall cohort (N=196)**

| **Collateral group** | **PH, n/N (%)** | **Adjusted OR (95% CI)** | **P value** |
| --- | --- | --- | --- |
| 0–1 (*reference*) | 9/39 (23.1%) | 1.00 (*reference*) | — |
| 2 | 6/77 (7.8%) | 0.21 (0.05–0.79) | 0.017 |
| 3–4 | 0/80 (0.0%) | 0.06 (0.00–0.72) | 0.023 |
| *P* for trend (1/2/3 coding) | — | — | 0.005 |

*PH, parenchymal hematoma; OR, odds ratio; CI, confidence interval.*

*Firth logistic regression was used due to (quasi-)complete separation (zero PH events in the 3–4 group). Model adjusted for age, sex, NIHSS, ASPECTS, onset-to-CT time, IVT, and EVT. P for trend treated collateral categories as an ordinal variable coded as 1/2/3 in the same adjusted model.*

**Table S5. Sensitivity analysis for parenchymal hematoma (PH): three-category collateral (0-1, 2, 3-4), Firth logistic regression: EVT subgroup (N=116)**

Model: Firth bias-reduced logistic regression.

| **Collateral group** | **PH, n/N (%)** | **Adjusted OR (95% CI)** | **P value** |
| --- | --- | --- | --- |
| 0–1 (*reference*) | 9/33 (27.3%) | 1.00 (*reference*) | — |
| 2 | 5/57 (8.8%) | 0.21 (0.04–0.83) | 0.026 |
| 3–4 | 0/26 (0.0%) | 0.07 (0.00–1.10) | 0.061 |
| *P* for trend (1/2/3 coding) | — | — | 0.009 |

*PH, parenchymal hematoma; OR, odds ratio; CI, confidence interval.*

*Firth logistic regression was used due to (quasi-)complete separation (zero PH events in the 3–4 group).* *EVT subgroup model adjusted for age, sex, NIHSS, ASPECTS, onset-to-CT time, IVT, and eTICI_success (eTICI ≥2b67). P for trend treated collateral categories as an ordinal variable coded as 1/2/3 in the same adjusted model.*

**Table S6. Sensitivity analysis using collateral score as a continuous variable (per 1-point increase): 90-day mRS shift and parenchymal hematoma (PH)**

| **Endpoint** | **Cohort** | **Effect per +1 point (95% CI)** | **P value** |
| --- | --- | --- | --- |
| 90-day mRS shift | Overall (N=196) | cOR 0.50 (0.34–0.75) | 0.001 |
| 90-day mRS shift | EVT subgroup (N=116) | cOR 0.85 (0.49–1.49) | 0.575 |
| PH | Overall (N=196) | OR 0.36 (0.14–0.89) | 0.027 |
| PH | EVT subgroup (N=116) | OR 0.31 (0.10–0.95) | 0.041 |

*PH, parenchymal hematoma; OR, odds ratio; CI, confidence interval.*

*For mRS shift, proportional odds ordinal logistic regression was used.*

*For PH, Firth bias-reduced logistic regression was used due to the limited number of PH events.*

*Overall cohort models adjusted for age, sex, NIHSS, ASPECTS, onset-to-CT time, IVT, and EVT.*

*EVT subgroup models adjusted for age, sex, NIHSS, ASPECTS, onset-to-CT time, IVT, and eTICI_success (eTICI ≥ 2b67).*

*In the ordinal shift analysis, a common odds ratio (cOR) < 1 indicates a shift toward lower mRS scores, corresponding to a more favorable functional outcome.*

*In the Firth-penalized logistic regression, an odds ratio (OR) < 1 indicates a lower odds of PH.*

**Table S7. Covariate balance before and after inverse probability of treatment weighting (IPTW) based on the prespecified propensity score model**

| **Covariate** | **Unadjusted EVT** | **Unadjusted non-EVT** | **|SMD| (Unadjusted)** | **IPTW-weighted EVT** | **IPTW-weighted non-EVT** | **|SMD| (IPTW)** |
| --- | --- | --- | --- | --- | --- | --- |
| Age (years) | 69.72 | 67.40 | 0.192 | 68.77 | 69.08 | 0.025 |
| NIHSS | 12.87 | 6.19 | 1.114 | 10.18 | 8.74 | 0.219 |
| ASPECTS | 7.09 | 8.10 | 0.617 | 7.35 | 7.56 | 0.119 |
| Onset-to-CT time | 5.17 | 11.24 | 0.560 | 6.64 | 8.26 | 0.172 |
| IVT_any (proportion) | 0.147 | 0.150 | 0.010 | 0.185 | 0.212 | 0.067 |
| Atrial fibrillation (proportion) | 0.491 | 0.275 | 0.445 | 0.422 | 0.457 | 0.070 |

*EVT, endovascular thrombectomy; IPTW, inverse probability of treatment weighting; SMD, standardized mean difference; NIHSS, National Institutes of Health Stroke Scale; ASPECTS, Alberta Stroke Program Early CT Score; IVT, intravenous thrombolysis; CT, computed tomography.
The propensity score model included the following prespecified covariates: age, NIHSS, ASPECTS, onset-to-CT time, IVT (any vs none), and atrial fibrillation. Stabilized ATE (average treatment effect) weights were applied with 1st/99th percentile weight trimming. Continuous variables are presented as group means; binary variables are presented as proportions. Lower |SMD| indicates better covariate balance (commonly, |SMD| <0.10 is considered well balanced).*

**Table S8. Association of endovascular thrombectomy (EVT) with outcomes: unadjusted, IPTW-weighted, and doubly robust analyses**

| **Outcome** | **Unadjusted OR (95% CI)** | **P value** | **IPTW OR (95% CI)** | **P value** | **Doubly robust OR (95% CI)** | **P value** |
| --- | --- | --- | --- | --- | --- | --- |
| mRS 0–2 | 0.282 (0.131–0.607) | 0.0012 | 0.628 (0.297–1.330) | 0.224 | 0.545 (0.214–1.387) | 0.203 |
| PH | 10.84 (1.40–84.22) | 0.0227 | 5.37 (0.795–36.28) | 0.0847 | 6.38 (0.473–86.11) | 0.163 |

*EVT, endovascular thrombectomy; IPTW, inverse probability of treatment weighting; OR, odds ratio; CI, confidence interval; mRS, modified Rankin Scale; PH, parenchymal hematoma; HBC, Heidelberg Bleeding Classification.
Unadjusted estimates were obtained from logistic regression models with EVT as the sole predictor. IPTW estimates were obtained from stabilized ATE-weighted logistic regression models using robust (sandwich) standard errors; weights were trimmed at the 1st and 99th percentiles. Doubly robust estimates were obtained from IPTW-weighted logistic regression models additionally adjusting for age, NIHSS, ASPECTS, onset-to-CT time, IVT (any vs none), and atrial fibrillation.*

**Table S9. Global test for collateral-by-endovascular thrombectomy (EVT) interaction on 90-day mRS shift (proportional odds model)**

| **Models compared (nested)** | **Model specification** | **Δdf (interaction)** | **LogLik (Model 1)** | **LogLik (Model 2)** | **Likelihood ratio χ²** | **P for interaction** |
| --- | --- | --- | --- | --- | --- | --- |
| Main-effects vs interaction | Model 1 (no interaction): mRS90 ~ collateral3 + EVT + age + sex + NIHSS + ASPECTS + onset_to_CT_time + IVT + MCA_occlusion | 2 | -254.03 |  |  |  |
|  | Model 2 (with interaction): mRS90 ~ collateral3 * EVT + age + sex + NIHSS + ASPECTS + onset_to_CT_time + IVT + MCA_occlusion |  |  | -253.38 | 1.2967 | **0.5229** |

*mRS, modified Rankin Scale; EVT, endovascular thrombectomy; NIHSS, National Institutes of Health Stroke Scale; ASPECTS, Alberta Stroke Program Early CT Score; CT, computed tomography; IVT, intravenous thrombolysis; MCA, middle cerebral artery; LRT, likelihood ratio test; df, degrees of freedom; χ², chi-square statistic*

*collateral3 was modeled as a three-level categorical variable (0–1, 2, 3–4; reference = 0–1). EVT denotes endovascular thrombectomy (yes/no).*

*The global P for interaction was obtained by a likelihood ratio test (LRT) comparing the interaction model (Model 2) with the main-effects model (Model 1). Because collateral3 has three categories, the collateral-by-EVT interaction has 2 degrees of freedom (Δdf = 2).*

*Covariates included age, sex, baseline NIHSS (National Institutes of Health Stroke Scale), ASPECTS (Alberta Stroke Program Early CT Score), onset_to_CT_time, pre_mRS (pre-stroke modified Rankin Scale), IVT (intravenous thrombolysis), and MCA_occlusion (middle cerebral artery occlusion).*

**Table S10. Inter-rater reliability for 4D-CTA collateral grading (0-4)**

| ***Reliability metric*** | ***Estimate*** |
| --- | --- |
| *Sample size, N* | *196* |
| *Exact agreement, n/N (%)* | *180/196 (91.84%)* |
| *Exact agreement, 95% CI (Wilson)* | *87.15%–94.91%* |
| *Within-one-grade agreement (* | *Δgrade* |
| *Within-one-grade agreement, 95% CI (Wilson)* | *98.08%–100.00%* |
| *Unweighted Cohen’s kappa, κ* | *0.886* |
| *Unweighted Cohen’s kappa, κ, 95% CI (bootstrap)* | *0.829–0.937* |
| *Weighted Cohen’s kappa, κw (linear weights)* | *0.924* |
| *Weighted Cohen’s kappa, κw (linear weights), 95% CI (bootstrap)* | *0.885–0.958* |
| *Weighted Cohen’s kappa, κw (quadratic weights)* | *0.958* |
| *Weighted Cohen’s kappa, κw (quadratic weights), 95% CI (bootstrap)* | *0.935–0.976* |

*Collateral grades were scored on an ordinal scale (0–4). Weighted Cohen’s kappa (κw) (linear weights) was used as the primary reliability metric for ordinal ratings; unweighted Cohen’s kappa (κ) reflects exact-category agreement beyond chance without accounting for the magnitude of disagreement. Within-one-grade agreement was defined as an absolute difference ≤1. CI denotes confidence interval.*

**Supplementary Figure S1**Receiver operating characteristic (ROC) curves for predicting favorable 90-day functional outcome (mRS 0–2) using the clinical model alone and the clinical-plus-collateral model.


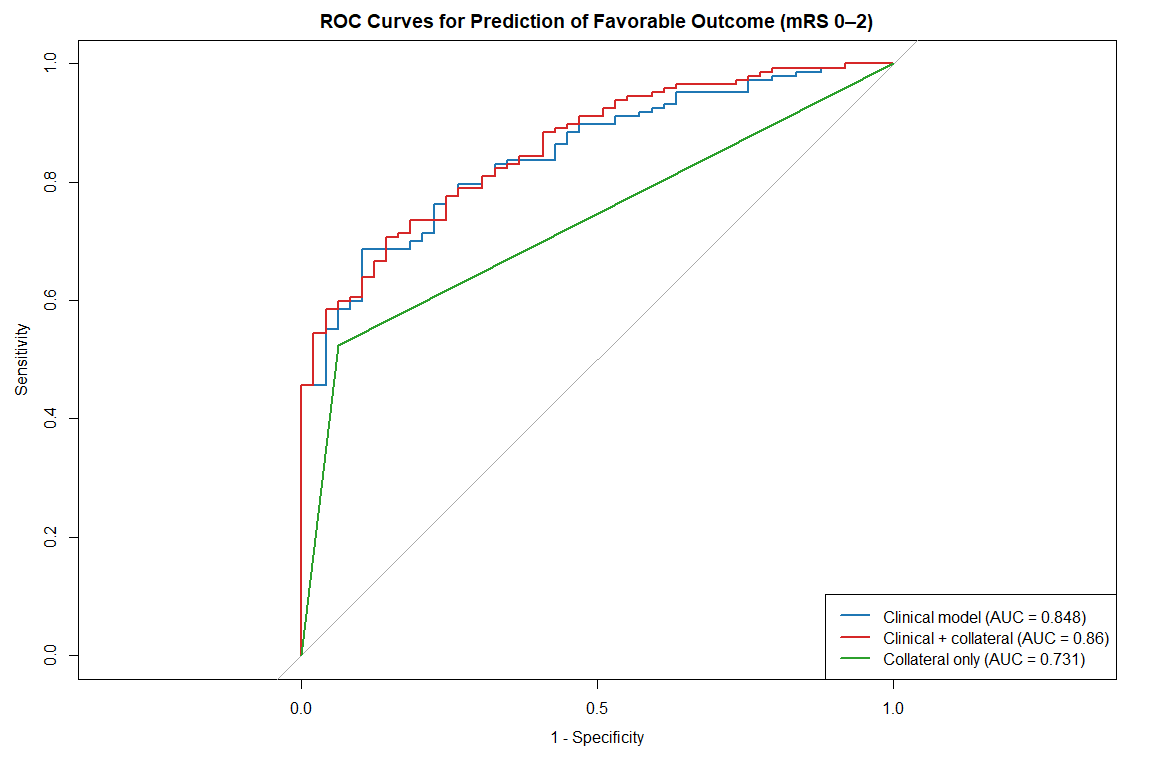
 *ROC indicates receiver operating characteristic; AUC, area under the curve;*

*The outcome was**favorable functional outcome at 90 days****,*** *defined as mRS 0–2. The clinical model included age, sex, baseline NIHSS, ASPECTS, onset-to-CT time, IVT, and EVT. The clinical-plus-collateral model additionally incorporated collateral status assessed by 4D-CTA. AUC values are shown to compare the discriminative performance of the two models. The difference in AUCs was assessed using the DeLong test. Calibration assessment did not reveal substantial miscalibration.*
